# Supplementary material for: Photodynamic Therapy Targeting Macrophages Using IRDye700DX-Liposomes Decreases Experimental Arthritis Development
Source: MDPI journal article supplement (doi:10.3390/pharmaceutics13111868), 2021-11-05
Supplement: s1 [file s1]

# Supplementary Materials: Photodynamic Therapy Targeting Macrophages Using IRDye700DX-Liposomes Decreases Experimental Arthritis Development

Daphne N. Dorst, Marti Boss, Mark Rijpkema, Birgitte Walgreen, Monique M.A. Helsen, Desirée L. Bos, Louis van Bloois, Gerrit Storm, Maarten Brom, Peter Laverman, Peter M. van der Kraan, Mijke Buitinga, Marije I. Koenders and Martin Gotthardt

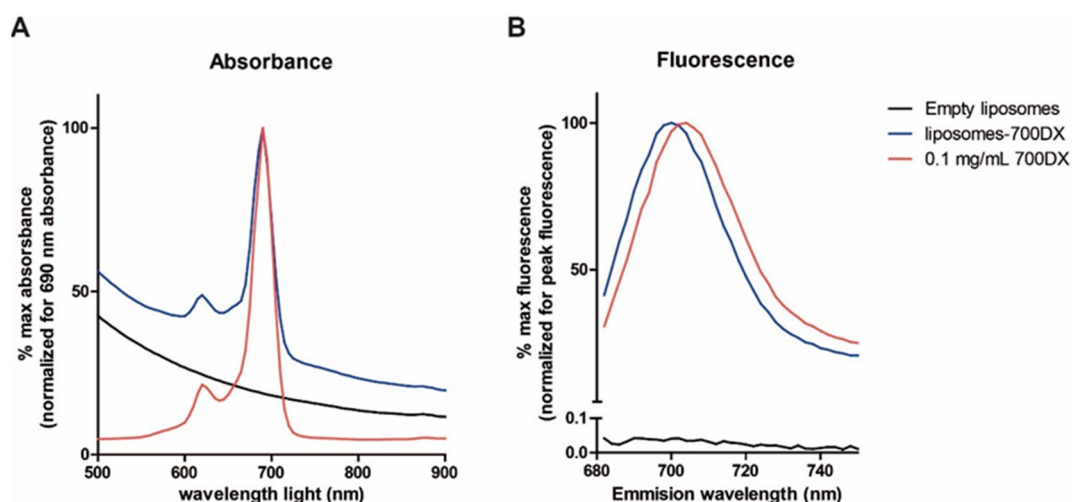

**Figure S1.** Absorbance (A) and fluorescence (B) spectra of liposome with and without IRDye700DX compared to free IRDye700DX. Both absorbance and fluorescence spectra are similar when comparing IRDye700DX loaded in liposomes or free PS (all in PBS). Fluorescence emission was measured after excitation at 650 nm.

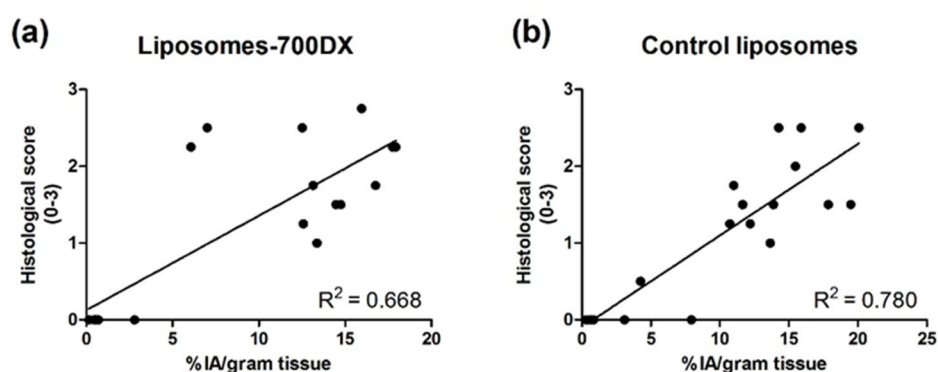

**Figure S2.** Uptake of liposomes with (a) and without (b) IRDye700DX correlates with histological scores of inflammation in the ankle joints of mice with CIA. ( $n=10$  mice).

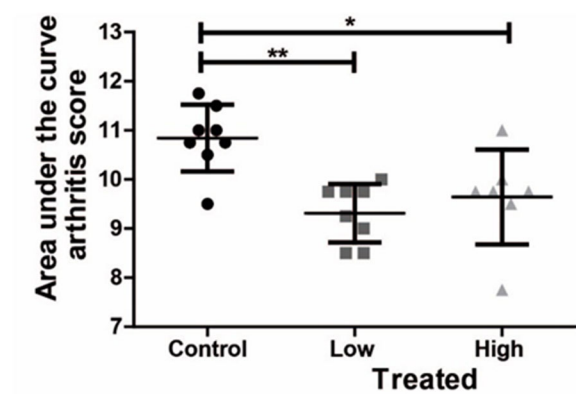

#### Legend

|               |           | Light dose<br>(J/cm <sup>2</sup> ) |
|---------------|-----------|------------------------------------|
| Control       | PBS       | 26.4                               |
| Treated: low  | Liposomes | 8.8                                |
| Treated: high | Liposomes | 26.4                               |

**Figure S3.** Area under the curve for the development of arthritis over time after 700DX-loaded liposome PDT. The AUC is significantly lower in the treated groups compared to PBS. Two-way ANOVA with Bonferroni post-test, \* =  $p < 0.05$ , \*\* =  $p < 0.01$  ( $n=8$  mice/group).

## Ankle joint

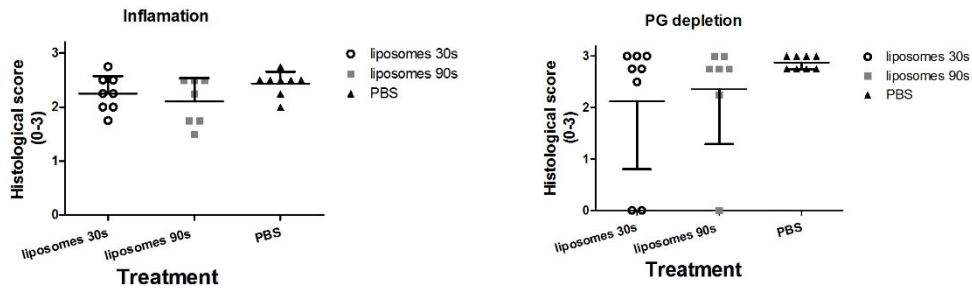

## Knee joint

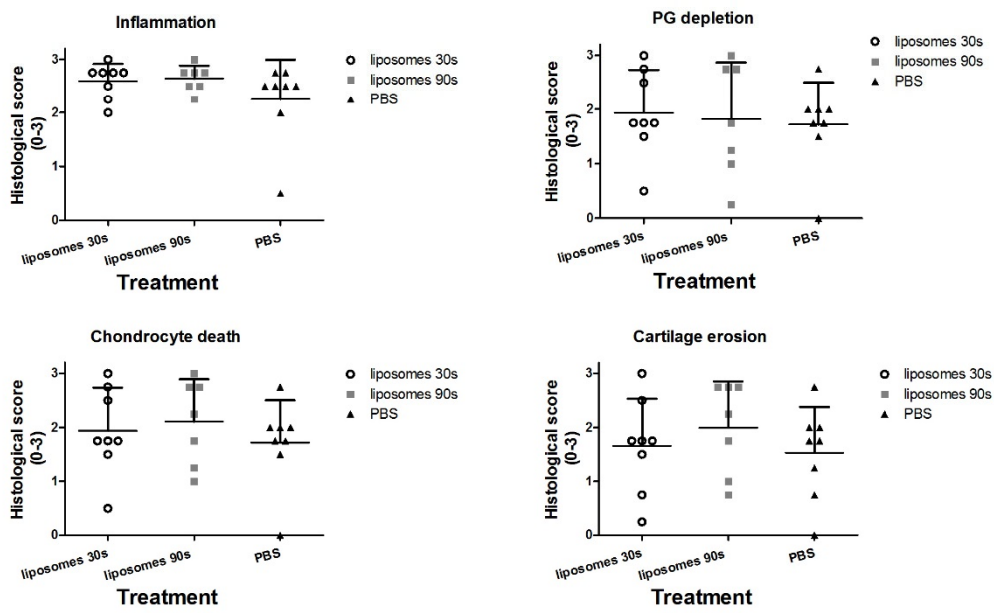

**Figure S4.** Histological scores of ankle and knee joint inflammation, proteoglycan depletion and knee chondrocyte death and cartilage erosion. Results are depicted as mean with SD (n = 8 mice, (n = 7 for the 90s exposed liposomes group)).
